# Supplementary material
Source: PubMed Central journal article supplement (PMC4252252)
Supplement: NIHMS620771-supplement-03.pdf [file NIHMS620771-supplement-03.pdf]

**Table 5:** Assessment of Risk Factors for Incident Cataract in Eyes without an Opportunistic Ocular Infection (participants in the Longitudinal Study of Ocular Complications of AIDS), Final Cox Regression Model.

| Characteristics*                                                                             | Rate per 100 Eye-years | Count of Cataracts per Eye-year at Risk | Unadjusted Hazard Ratio (95% Confidence Interval [CI]) | Unadjusted P-value | Adjusted Hazard Ratio (95% CI) | Adjusted P-value |
|----------------------------------------------------------------------------------------------|------------------------|-----------------------------------------|--------------------------------------------------------|--------------------|--------------------------------|------------------|
| <b>Human Immunodeficiency Virus (HIV)/Acquired Immune Deficiency Syndrome (AIDS) History</b> |                        |                                         |                                                        |                    |                                |                  |
| CD4+ T cells (time-varying)                                                                  |                        |                                         |                                                        |                    |                                |                  |
| ≥50 cells/uL                                                                                 | 0.43                   | ( 50 / 11633)                           | 1.00                                                   |                    | 1.00                           |                  |
| < 50 cells/uL                                                                                | 0.55                   | ( 6 / 1091.3)                           | 2.16 (0.88, 5.25)                                      | 0.090              | 1.64 (0.77, 3.45)              | 0.19             |
|                                                                                              | 0                      | ( 0 / 135.7)                            |                                                        |                    |                                |                  |
| Nadir CD4+ T cells (at enrollment)                                                           |                        |                                         |                                                        |                    |                                |                  |
| ≥50 cells/uL                                                                                 | 0.64                   | ( 39 / 6132.4)                          | 1.00                                                   |                    | 1.00                           |                  |
| < 50 cells/uL                                                                                | 0.26                   | ( 17 / 6458.2)                          | 0.62 (0.33, 1.16)                                      | 0.13               | 0.55 (0.31, 0.95)              | 0.031            |
|                                                                                              | 0                      | ( 0 / 111.6)                            |                                                        |                    |                                |                  |
| HIV viral load (time-varying)                                                                |                        |                                         |                                                        |                    |                                |                  |
| < 2.6 (undetectable)                                                                         | 0.45                   | ( 35 / 7764.9)                          | 1.00                                                   |                    | 1.00                           |                  |
| 2.6 or higher                                                                                | 0.43                   | ( 21 / 4849.8)                          | 1.58 (0.9, 2.76)                                       | 0.11               | 1.51 (0.86, 2.64)              | 0.1485           |
| Highly active antiretroviral therapy (time-varying)                                          |                        |                                         |                                                        |                    |                                |                  |
| No                                                                                           | 0.81                   | ( 8 / 982.8)                            | 1.00                                                   |                    | 1.00                           |                  |
| Yes                                                                                          | 0.41                   | ( 48 / 11743.6)                         | 0.5 (0.22, 1.1)                                        | 0.082              | 0.54 (0.26, 1.11)              | 0.093            |
| <b>Ocular Characteristics</b>                                                                |                        |                                         |                                                        |                    |                                |                  |
| History of cataract in contralateral eye                                                     |                        |                                         |                                                        |                    |                                |                  |
| No                                                                                           | 0.27                   | 34 / 12570.3                            | 1.00                                                   |                    | 1.00                           |                  |
| Yes                                                                                          | 14.1                   | 22 / 156                                | 21.16 (10.05, 44.53)                                   | < 0.0001           | 21.58 (10.39, 44.81)           | < 0.0001         |

|                                       |      |              |                    |          |                    |          |
|---------------------------------------|------|--------------|--------------------|----------|--------------------|----------|
| Anterior inflammation (time-varying)† |      |              |                    |          |                    |          |
| No                                    | 0.4  | 50 / 12570.3 | 1.00               |          | 1.00               |          |
| Yes                                   | 3.85 | 6 / 156      | 6 (1.67, 21.52)    | 0.0060   | 4.40 (1.64, 11.78) | 0.0032   |
| Vitreous inflammation (time-varying)‡ |      |              |                    |          |                    |          |
| No                                    | 0.41 | 52 / 12661.8 | 1.00               |          | 1.00               |          |
| Yes                                   | 6.2  | 4 / 64.5     | 11.31 (3.6, 35.52) | < 0.0001 | 7.12 (2.02, 25.02) | 0.0022   |
| History of retinal detachment§        |      |              |                    |          |                    |          |
| No                                    | 0.39 | 48 / 12387.4 | 1.00               |          | 1.00               |          |
| Yes                                   | 2.36 | 8 / 338.9    | 5.30 (2.51, 11.16) | < 0.0001 | 4.94 (2.21, 11.02) | < 0.0001 |

---

\* Additional variables that were not associated with increased incidence of cataract included: gender, race, education, anemia (time-varying), diabetes, hypertension, hyperlipidemia, current CD4+ T-cells, current human immunodeficiency virus load, current use of highly active antiretroviral therapy, and hepatitis C. Nadir CD4+ T-cell count had no crude association with incident cataract, but was associated with incident cataract after adjustment for the factors above. Several variables were associated significantly with incident cataract in the crude analysis, but were omitted from the adjusted analysis because they were confounded by 1 or more of the variables in the final model and were not associated with incident cataract after adjustment. These include: Karnofsky score and hepatitis B.

† Anterior chamber cells or flare, diagnosis with anterior uveitis or keratitis, presence of posterior synechiae, or a combination thereof.

‡ Vitreous haze, anterior vitreous cells, intermediate uveitis, endophthalmitis.

§ Retinal detachment includes individuals with a documented history of retinal detachment and/or the presence of silicone oil.

**Table 6: Assessment of Risk Factors for Incident Cataract in Eyes without an Opportunistic Ocular Infection (participants in the Longitudinal Study of Ocular Complications of AIDS)**

| Characteristics*                   | Rate per 100 Eye-years | Count of Cataracts per Eye-years at Risk | Ratio (95% Confi-) | Unadjusted P-value | Adjusted Hazard Ratio (95% CI) | Adjusted P-value |
|------------------------------------|------------------------|------------------------------------------|--------------------|--------------------|--------------------------------|------------------|
| <b>Demographic characteristics</b> |                        |                                          |                    |                    |                                |                  |
| Gender                             |                        |                                          |                    |                    |                                |                  |
| Female                             | 0.49                   | ( 12 / 2438.4)                           | 1.00               |                    | 1.00                           |                  |
| Male                               | 0.43                   | ( 44 / 10288)                            | 0.86 (0.45, 1.65)  | 0.6538             | 0.98 (0.5, 1.92)               | 0.9535           |
| Race/Ethnicity                     |                        |                                          |                    |                    |                                |                  |
| Not black                          | 0.44                   | ( 37 / 8366)                             | 1.00               |                    | 1.00                           |                  |
| Black                              | 0.44                   | ( 19 / 4360.3)                           | 1.43 (0.78, 2.61)  | 0.2468             | 1.20 (0.71, 2.05)              | 0.4898           |
|                                    | 4.15                   | ( 1 / 24.1)                              |                    |                    |                                |                  |
| Education (at enrollment)          |                        |                                          |                    |                    |                                |                  |
| High school or less                | 0.45                   | ( 21 / 4646.8)                           | 1.00               |                    | 1.00                           |                  |
| Some college                       | 0.25                   | ( 10 / 3926.3)                           | 0.54 (0.25, 1.14)  | 0.1025             | 0.72 (0.34, 1.52)              | 0.3891           |
| College graduate                   | 0.58                   | ( 24 / 4129.1)                           | 0.82 (0.43, 1.53)  | 0.5269             | 1.03 (0.57, 1.84)              | 0.9300           |
| <b>Associated morbidities</b>      |                        |                                          |                    |                    |                                |                  |
| Karnofsky score (at enrollment)    |                        |                                          |                    |                    |                                |                  |
| 90-100                             | 0.36                   | ( 26 / 7285.9)                           | 1.00               |                    | 1.00                           |                  |
| ≤80                                | 0.55                   | ( 30 / 5440.4)                           | 1.73 (1.01, 2.96)  | 0.0457             | 1.43 (0.85, 2.39)              | 0.1740           |
|                                    | 0                      | ( 0 / 3.8)                               |                    |                    |                                |                  |
| Anemia (time-varying)              |                        |                                          |                    |                    |                                |                  |
| No                                 | 0.43                   | ( 37 / 8645.3)                           | 1.00               |                    | 1.00                           |                  |
| Yes                                | 0.47                   | ( 19 / 4077.3)                           | 1.37 (0.77, 2.42)  | 0.2819             | 1.35 (0.82, 2.21)              | 0.2378           |

|                                                                                              |      |                 |                   |        |                   |        |
|----------------------------------------------------------------------------------------------|------|-----------------|-------------------|--------|-------------------|--------|
| Diabetes (at enrollment)                                                                     |      |                 |                   |        |                   |        |
| No                                                                                           | 0.44 | ( 51 / 11664.1) | 1.00              |        | 1.00              |        |
| Yes                                                                                          | 0.47 | ( 5 / 1062.2)   | 0.89 (0.35, 2.21) | 0.7940 | 0.91 (0.35, 2.35) | 0.8484 |
| Hypertension (at enrollment)                                                                 |      |                 |                   |        |                   |        |
| No                                                                                           | 0.37 | ( 39 / 10408.6) | 1.00              |        | 1.00              |        |
| Yes                                                                                          | 0.73 | ( 17 / 2317.7)  | 1.36 (0.77, 2.39) | 0.2815 | 1.41 (0.77, 2.57) | 0.2604 |
|                                                                                              | 0    | ( 0 / 10.3)     |                   |        |                   |        |
| Hyperlipidemia (at enrollment)                                                               |      |                 |                   |        |                   |        |
| No                                                                                           | 0.41 | ( 40 / 9757.9)  | 1.00              |        | 1.00              |        |
| Yes                                                                                          | 0.54 | ( 16 / 2958.1)  | 1.12 (0.61, 2.04) | 0.7202 | 1.16 (0.6, 2.22)  | 0.6494 |
| <b>Human Immunodeficiency Virus (HIV)/Acquired Immune Deficiency Syndrome (AIDS) History</b> |      |                 |                   |        |                   |        |
| CD4+ T cells (time-varying)                                                                  |      |                 |                   |        |                   |        |
| ≥50 cells/uL                                                                                 | 0.43 | ( 50 / 11633)   | 1.00              |        | 1.00              |        |
| < 50 cells/uL                                                                                | 0.55 | ( 6 / 1091.3)   | 2.16 (0.88, 5.25) | 0.0896 | 1.64 (0.77, 3.45) | 0.1925 |
|                                                                                              | 0    | ( 0 / 135.7)    |                   |        |                   |        |
| Nadir CD4+ T cells (at enrollment)                                                           |      |                 |                   |        |                   |        |
| ≥50 cells/uL                                                                                 | 0.64 | ( 39 / 6132.4)  | 1.00              |        | 1.00              |        |
| < 50 cells/uL                                                                                | 0.26 | ( 17 / 6458.2)  | 0.62 (0.33, 1.16) | 0.1312 | 0.55 (0.31, 0.95) | 0.0307 |
|                                                                                              | 0    | ( 0 / 111.6)    |                   |        |                   |        |
| HIV viral load (time-varying)                                                                |      |                 |                   |        |                   |        |
| [Log10(copies/mL)]                                                                           |      |                 |                   |        |                   |        |
| < 2.6 (undetectable)                                                                         | 0.45 | ( 35 / 7764.9)  | 1.00              |        | 1.00              |        |
| 2.6 or higher                                                                                | 0.43 | ( 21 / 4849.8)  | 1.58 (0.9, 2.76)  | 0.1050 | 1.51 (0.86, 2.64) | 0.1485 |
| Highly active antiretroviral therapy (time-varying)                                          |      |                 |                   |        |                   |        |
| No                                                                                           | 0.81 | ( 8 / 982.8)    | 1.00              |        | 1.00              |        |
| Yes                                                                                          | 0.41 | ( 48 / 11743.6) | 0.5 (0.22, 1.1)   | 0.0819 | 0.54 (0.26, 1.11) | 0.0930 |

## Co-infections

|                             |      |                 |                  |        |                   |        |
|-----------------------------|------|-----------------|------------------|--------|-------------------|--------|
| Hepatitis B (at enrollment) |      |                 |                  |        |                   |        |
| No                          | 0.42 | ( 51 / 12206.9) | 1.00             |        | 1.00              |        |
| Yes                         | 0.97 | ( 5 / 516.3)    | 2.7 (1.04, 7.01) | 0.0406 | 2.36 (0.93, 5.98) | 0.0705 |
|                             | 0    | ( 0 / 3.1)      |                  |        |                   |        |

|                             |      |                 |                   |        |                   |        |
|-----------------------------|------|-----------------|-------------------|--------|-------------------|--------|
| Hepatitis C (at enrollment) |      |                 |                   |        |                   |        |
| No                          | 0.45 | ( 55 / 12171.1) | 1.00              |        | 1.00              |        |
| Yes                         | 0.18 | ( 1 / 552.1)    | 0.45 (0.06, 3.28) | 0.4306 | 0.56 (0.08, 3.95) | 0.5640 |

## Ocular characteristics

|                                          |      |                 |                      |          |                      |          |
|------------------------------------------|------|-----------------|----------------------|----------|----------------------|----------|
| History of cataract in contralateral eye |      |                 |                      |          |                      |          |
| No                                       | 0.27 | ( 34 / 12570.3) | 1.00                 |          | 1.00                 |          |
| Yes                                      | 14.1 | ( 22 / 156)     | 21.16 (10.05, 44.53) | < 0.0001 | 21.58 (10.39, 44.81) | < 0.0001 |

|                                       |      |                 |                 |        |                    |        |
|---------------------------------------|------|-----------------|-----------------|--------|--------------------|--------|
| Anterior inflammation (time-varying)† |      |                 |                 |        |                    |        |
| No                                    | 0.4  | ( 50 / 12570.3) | 1.00            |        | 1.00               |        |
| Yes                                   | 3.85 | ( 6 / 156)      | 6 (1.67, 21.52) | 0.0060 | 4.40 (1.64, 11.78) | 0.0032 |

|                                       |      |                 |                    |          |                    |        |
|---------------------------------------|------|-----------------|--------------------|----------|--------------------|--------|
| Vitreous inflammation (time-varying)‡ |      |                 |                    |          |                    |        |
| No                                    | 0.41 | ( 52 / 12661.8) | 1.00               |          | 1.00               |        |
| Yes                                   | 6.2  | ( 4 / 64.5)     | 11.31 (3.6, 35.52) | < 0.0001 | 7.12 (2.02, 25.02) | 0.0022 |

|                                |      |                 |                    |          |                    |          |
|--------------------------------|------|-----------------|--------------------|----------|--------------------|----------|
| History of retinal detachment§ |      |                 |                    |          |                    |          |
| No                             | 0.39 | ( 48 / 12387.4) | 1.00               |          | 1.00               |          |
| Yes                            | 2.36 | ( 8 / 338.9)    | 5.30 (2.51, 11.16) | < 0.0001 | 4.94 (2.21, 11.02) | < 0.0001 |

---

† Anterior chamber cells or flare, diagnosis with anterior uveitis or keratitis, presence of posterior synechiae, or a combination thereof.

‡ Vitreous haze, anterior vitreous cells, intermediate uveitis, endophthalmitis.

§ Retinal detachment includes individuals with a documented history of retinal detachment and/or the presence of silicone oil.
