# Supplementary material
Source: PubMed Central journal article supplement (PMC4252252)
Supplement: NIHMS620771-supplement-04.pdf [file NIHMS620771-supplement-04.pdf]

## Longitudinal Study of Ocular Complications of AIDS Clinical Centers - Credit Roster (as of November 21, 2013)

---

### Key Personnel (LSOCA certified) 1997 - 2013

**Baylor College of Medicine, Cullen Eye Institute, Houston, TX:** Richard Alan Lewis, MD, MS (Director); Robert E. Coffee III, MD; Valerie Gudell, DMA; Joseph F. Morales, CRA; Silvia Orenge-Nania, MD; Steven S. Spencer, BA, COMT, CCRP; Mitchell P. Weikert, MD. **Former Members:** Richard C. Allen, MD; John Michael Bourg; Victor Fainstein, MD; Pamela Frady, COMT; Ronald Gross, MD; Zbigniew Krason, CRA; Tobias C. Samo, MD; Allison Schmidt, CRA; Laura Shawver, COT/CCRP; James Shigley, CRA (deceased); Benita Slight, COT; Rachel Sotuyo, COT; Kay R. Stephenson, COT, BA, CCRP; Stephen Travers, CRA.

**Emory University Eye Center, Atlanta, GA:** Steven Yeh, MD (Director); Deborah Gibbs, COMT, CCRC, CCRP; Debora Jordan, CRA; Janna Rutter, CRA. **Former Members:** Antonio Capone, Jr. MD; David Furukuwa, PA; Allison Gibbs, BS; Baker Hubbard, MD; Steven Kim, MD; Daniel F. Martin, MD; Bob Myles, CRA; Bryan Schwent, MD; Sunil K. Srivastava, MD.

**Johns Hopkins University School of Medicine, Baltimore, MD:** J.P. Dunn, MD (Director); Kristen Brotherson, BS; Bryn Burkholder, MD; Nicholas Butler, MD; Dennis Cain; David Emmert; Theresa Gan Leung, MD; Charles Mark Herring; Ahmadreza Moradi, MD; Antonia Nwankwo-Marshall; Jennifer E. Thorne, MD, PhD. **Former Members:** Ellen Arnold, BS; Patricia Barditch-Crovo, MD; Patricia Barnabie, BS; Marie-Lyne Bélair, MD; Stephen G. Bolton, CRNP; Joseph B. Brodine; Diane M. Brown, RN; Lisa M. Brune, RN, BSN; Anat Galor, MD; Douglas A. Jabs, MD, MBA; Adam Jacobowitz, MD; Meera Kapoor; Sanjay R. Kedhar, MD; John H. Kempen, MD, PhD; Stephen J. Kim, MD; Henry A. Leder, MD; Alison G. Livingston, RN, BSN; Yavette Morton; Kisten D. Nolan, RN, BSN, MPH; Armando L. Oliver, MD; George B. Peters, III, MD; Richard D. Semba, MD, MPH; Priscilla Soto; Ricardo Stevenson, MD; Michelle Tarver-Carr, MD, PhD; Lynnet Tirabassi, RN, BSN; Susan Wittenberg, MD; Michelle Yue Wang, MD.

**Louisiana State University Health Sciences Center, New Orleans, LA:** Donald Bergsma, MD (Director); Rebecca Clark, MD; Robin Cooper, COMT; Christine Jarrott, RN, ACRN; P. Sean O'Sullivan, MD; Maria Reinoso, MD Christine Romero, COT, ROUB. **Former Members:** Bruce Barron, MD; Robin Bye, RN; Mandi Conway, MD; Larry Dillon, COT/CRA; Jasmine Elison, MD; Butler Fuller, MD; Audrey Lombard, RN; Lynn Otilio, COT; Gholman Peyman, MD.

**Memorial Sloan Kettering Center, New York, NY:** Murk-Hein Heinemann, MD (Director); Susana Coleman; Sara Daniel; Roberta Janis, RN, BSN; Andrzej Kozbial; Kent Sepkowitz, MD. **Former Members:** Kenneth Boyd; Robinson V.P. Chan, MD; Cynthia Chiu, MD; Minhee Cho, MD; Charles Cole, MD; Charles Doering, MD; Jasmine Elison, MD; Aziz Khanifar, MD; Fang Lu; Joseph Murphy; Sophia Pachydaki, MD; Christiana Peroni, MD; Firas M. Rahhal, MD; Ashok Reddy, MD.

**New York University Medical Center, New York, NY:** Dorothy N. Friedberg, MD, PhD (Director); Adrienne Addressi, MA, RN; Douglas Dieterich, MD; Monica Lorenzo-Latkany, MD; Maria Pei, COA. **Former Member:** Alex McMeeking, MD.

**Northwestern University, Chicago, IL:** Alice T. Lyon, MD (Director); Lori Ackatz, RN, MPH; Manjot Gill, MD; Lori Kaminski, RN, MS; Rukshana Mirza, MD; Robert Murphy, MD; Frank Palella, MD; Carmen Ramirez; Zuzanna Rozenbajgier, MA; Dawn Ryan, CRA; Evica Simjanoski, BFA, CRA; **Former Members:** Alexander Habib; Jill Koecher; Jeevan Mathura, MD; Annmarie Muñana, RN; Jonathan Shankle; David V. Weinberg, MD; James Yuhr.

**University of California, Los Angeles, CA:** Gary N. Holland, MD (Director); Robert D. Almanzor, COA; Margrit E. Carlson, MD; Jose T. Castellanos, COT; Serina Gonzales; Ann K. Johiro, MN, RN,BC, FNP-C, AACRN, AAHIVS; Susan S. Ransome, MD. **Former Members:** Suzette A. Chafey, RN, NP; Alexander C. Charonis, MD; Jeffrey A. Craddock, COT; Partho S. Kalyani, MD; Michael A. Kapamajian, MD; Peter J. Kappel, MD; David L. LeBeck (*deceased*); Kristin M. Lipka; Ardis A. Moe, MD; Germán Piñón; Angela Sanderson; Kayur H. Shah, MD; Robert Stalling, COA; Dennis Thayer, CRA; Jean D. Vaudaux, MD.

**University of California, San Diego, CA:** Cheryl A. Arcinue, MD (Director); Payam Amini, MD; Janne Chuang; Isaac Ezon, MD; William R. Freeman, MD; Leonard Holmes; Azadeh Khatibi, MD; Veronica Mendoza. **Former Members:** Sunan Chaidhawanqual, MD; Lingyun Cheng, MD; Tom Clark; Mark Cleveland; Denise Cochran; Randall L. Gannon; Claudio Garcia, MD; Daniel Goldberg, MD; Joshua Hedaya, MD; Marietta Karavellas, MD; Tiara Kemper; Brian Kosobucki; Igor Kozak, MD (Director); Megan Loughran; Luzandra Magana; Alona Mask; Victoria Morrison, MD; Vivian Nguyen; Stephen Oster, MD; Nicole Reagan MD; Mi-Kyoung Song, MD; Francesca Torriani, MD; Dorothy Wong; Karen Yesensky; Tekeena Young.

**University of California, San Francisco, CA:** Jacque Duncan, MD (Director); Robert Bhisitkul, MD, PhD; David Clay; Michael Deiner; Donald Eubank; Mark Jacobson, MD; Mary Lew, COT; Todd Margolis, MD, PhD; Arshia Mian. **Former Members:** Judith Aberg, MD; Fermin Ballesteros, Jr.; Debra Brown; Jacqueline Hoffman; Alexander Irvine, MD; James Larson; Jody Lawrence, MD; Michael Narahara; Monique Trinidad.

**University of North Carolina, Chapel Hill, NC:** Travis A. Meredith, MD (Director); Sandy Barnhart, MPH; Debra Cantrell; Seema Garg, MD, PhD; Odette Houghton, MD; Megha Karmalkar; Maurice B. Landers, MD; Sarah Moyer; David Wohl, MD. **Former Members:** Cynthia Aurrichio, OD; Stephanie Betran; Kelly DeBoer; Elizabeth DuBose, MPH; David Eifrig, MD; John Foley, MD; Elizabeth Hartnett, MD; Angela Jeffries; Harpreet Kaur; Jan Kylstra, MD; Barbara Longmire; Sharon Myers; Fatima N'Dure, COA; Kean T. Oh, MD; Jeremy Pantell; Susan Pedersen, RN; Cadmus Rich, MD; Cecilia A. Sotelo, RN; Charles van der Horst, MD; Samir Wadhvania.

**University of Pennsylvania Medical Center, Philadelphia, PA:** Charles W. Nichols, MD (Director); Mark Bardsley, BSN; John Beaver, RN; Cheryl C. Devine; Jay Kostman, MD; Albert Maguire, MD; William Nyberg. **Former Members:** Chris Helker, RN; RobRoy MacGregor, MD; Karen McGibney, RN; Keith Mickelberg, RN; Leslie Smith, RN.

**University of South Florida, Tampa, FL:** Peter Reed Pavan, MD (Director); Ken Albritton; Linda Clark; JoAnn Leto, COT; Brian Madow, MD; Lori, Mayor; Richard Oehler, MD; Wyatt Saxon. **Former Members:** Linda Bergen-Losee; Andrew Burrows, MD; Steve Carlton; Burton Goldstein, MD; Sandra Gompf, MD; Bonnie Hernandez, COT; Mohan Iyer, MD; Patrick Kelty, MD; Amy Kramer, COT; Julie Larkin, MD; Sharon Millard, RN, COT; Jeffrey Nadler, MD; Robert Nelson, MD; Nandesh Patel, MD; Scott E. Paulter, MD; James Powers, MD; Susan Sherouse, COT; Jennifer Tordilla-Wadia, MD; Nancy Walker, COA.

**Chairman's Office, Mount Sinai School of Medicine, New York, NY:** Douglas A. Jabs, MD, MBA (Study Chairman); Amanda Allen; Yasmin Hilal, MHS; Karen Pascual, MBA; Jill Slutsky-Sanon, MPA. **Former member:** Amy Cooperstein, MPH; Melissa Nieves, BA; Judith C. Southall; Maria Stevens, CM.

**Coordinating Center, The Johns Hopkins University Bloomberg School of Public Health, Baltimore, MD:** Curtis L. Meinert, PhD (Director); Alka Ahuja, MS; Debra A. Amend-Libercci; Karen L. Collins; Betty J. Collison; John Dodge; Michele Donithan, MHS; Lea T. Drye, MS, PhD; Cathleen Ewing; Janet T. Holbrook, MS, MPH, PhD; Milana R. Isaacson, BS; Rosetta M. Jackson; Patrick May, MS; Girlie Reyes; Lee Sensinger, MA; Efe Sezgin, PhD; Jacki Smith, AA; Michael Smith, BS; Elizabeth Sugar, PhD; Jennifer E. Thorne, MD, PhD; James A. Tonascia, PhD; Vijay Vaidya, MS, MPH; Mark L. Van Natta, MHS; Annette Wagoner. **Former members:** Carley Benham; Laura Coleson-Schreur, RN; Ryan Colvin, MPH; Kathryn Connor, BA; Gregory Foster, MS; Kevin Frick, PhD; Judith Harle; Adele M. Kaplan Gilpin, JD, PhD; John H. Kempen, MD, PhD; Hope Livingston; Barbara K. Martin, PhD; Nancy Min, MPH, PhD; Laurel Murrow, MS; Maria J. Oziemkowska, MS, MPH; Bonnie Piantadosi, MS; Milo Puhan, MD, PhD; Wai Ping Ng, BS; Shoshana Reshef, PhD, MPH; Pamela E. Scott, MA; Erica Smothers; Emily West, PhD; Claudine Woo, MPH; Albert Wu, MD, MPH; Alice Zong.

**Fundus Photograph Reading Center, University of Wisconsin, Madison, WI:** Ronald Danis, MD (Director); Charles Chandler; Gregory Guilfoil; Jeffrey Joyce; Nancy Robinson; Dennis Thayer; Jeong Won Pak, PhD; Grace Zhang. *Former members:* Michael Altaweel, MD; Jane Armstrong; Matthew D. Davis, MD; Sapna Gangaputra, MD, MPH; Sheri Glaeser; Larry Hubbard, MAT; Katrina Hughes; Dolores Hurlburt; Linda Kastorff; Michael Neider, BA; Thomas Pauli; Therese Traut; Marilyn Vanderhoof-Young; Hugh Wabers.

**National Eye Institute, Bethesda, MD:** Natalie Kurinij, PhD; Steven Oversby, PsyD. Former Project Officer: Richard Mowery, PhD.

**Officers of the Study:** Douglas A. Jabs, MD, MBA (Chair); Ronald Danis, MD; Natalie Kurinij, PhD; Curtis L. Meinert, PhD; Steven Oversby, PsyD; Jennifer E. Thorne, MD, PhD. *Former Members:* Matthew D. Davis, MD; Janet T. Holbrook, MS, MPH, PhD.

**Steering Committee:** Douglas A. Jabs, MD, MBA (Chair); Lori Ackatz, RN, MPH; Ronald Danis, MD; Dorothy Friedberg, MD; Gary N. Holland, MD; Milana R. Isaacson, BS; Mark Jacobson, MD; Ann Johiro, MN, RN, BC, FNP-C, AACRN; Natalie Kurinij, PhD; Alice Lyon, MD; Curtis L. Meinert, PhD; Christine Romero, COT; Steven Oversby, PsyD; Jennifer E. Thorne, MD, PhD. *Former Members:* Adrienne Addressi, MA, RN; Lisa Brune, RN, BSN; Rebecca Clark, MD; Tom Clark, CRA; Janet Davis, MD; Matthew D. Davis, MD; James P. Dunn, MD; William R. Freeman, MD; Dorothy Friedberg, MD; James Gilman; Janet T. Holbrook, MS, MPH, PhD; John Horna; Larry Hubbard, MAT; Mark Jacobson, MD; Richard Lewis, MD, MS; Daniel F. Martin, MD; Travis A. Meredith, MD; Annmarie Muñana, RN; Robert Murphy, MD; Kisten D. Nolan, RN, BSN, MPH; William Nyberg; Frank Palella, MD; P. Reed Pavan, MD; Steven Spencer, BA, COMT; Tim Steffens, CRA; Dennis Thayer; Charles van der Horst, MD; Fran Wallach.

**Policy and Data Monitoring Board:** John P. Phair, MD (Chair); Brian P. Conway, MD; Ronald Danis, MD; Barry R. Davis, MD, PhD; Douglas A. Jabs, MD, MBA; Natalie Kurinij, PhD; Curtis L. Meinert, PhD; David Musch, PhD; Robert B. Nussenblatt, MD; Steven Oversby, PsyD; Jennifer E. Thorne, MD, PhD; Richard Whitley, MD; Leslie Wolf, JD, MPH. *Former Members:* Beverly Alston, MD; B. William Brown, Jr., PhD; Matthew D. Davis, MD; James Grizzle, PhD; Argye Hillis, PhD; Janet T. Holbrook, MS, MPH, PhD; Harmon Smith, PhD; James A. Tonascia, PhD.

**Visual Function Quality Assurance Committee:** Steven Spencer, BA, COMT, CCRP (Chair); Robert D. Almanzor, COT; Deborah Gibbs, COMT; Milana Isaacson, BS; Mary Lew, COT ;Richard Alan Lewis, MD, MS (Advisor);. *Former Members:* Ferman Ballesteros; Jeff Grijalva, COT; Karen Lopez; Laura G. Neisser, COT; Rosa Paez-Boham, COST.

**The Los Angeles Latino Eye Study Group (LALES II):**

University of Southern California, Los Angeles, CA: Rohit Varma, MD, MPH (Principal Investigator); Stanley P. Azen, PhD (Co-Principal Investigator); Mina Torres, MS (Project Director); Jaime Barrera; Farzana Choudhury, MBBS, MPH; Lupe Cisneros, COA; Jessica Chung, MPH, PhD (2008); Elizabeth Corona; Carolina Cuestas, OD; Anne DiLauro, MPH (2005-2007); Jeanne Dzekov (2005-2010); Ana Evans (2004-2007); Athena W.P. Foong(2007-2008); Carlos Lastra, MD; Mei-Ying Lai, MS (2004-2006); George Martinez; Roberta McKean-Cowdin, PhD; Carlos Moya; Sylvia H. Paz, MS (2004-2005); Fernando Pena, MD (2004-2005); Corina Shtir, MS (2008-2009); Ronald E. Smith, MD; LaVina Tetrow (2004-2005); Heather Volk, PhD (2008); Ying Wang, MS (2006-2007); Joanne Wu, MPH (2004-2006).

Battelle Survey Research Center, St. Louis, MO: Lisa John, MSW; Karen Tucker, MA; Natasha Van Leeuwen.

## **Former clinics**

### **Indiana University, Indianapolis, IN [Active from October 1997 to July 2008]:**

Former Members: Mitchell Goldman, MD (Director); Janice Brown; Thomas Ciulla, MD; Jean Craft, RN, CS; Ronald Danis, MD; Paul Fry; Hua Gao, MD; Samir Gupta, MD; Janet Hernandez, RN; Debra Poe; Linda Pratt, RN; James D. Richardson, MD; Tim Steffens, CRA; L. Joseph Wheat, MD; Beth Zwickl, RN, CS, MSN.

### **New Jersey Medical School, Newark, NJ [Active from April 1995 to January 2009]:**

Former Members : Ronald Rescigno, MD (Director); Neelakshi Bhagat, MD; Rosa Paez-Boham, COMT; Marta Paez-Quinde.

### **Rush University, Chicago, IL [Active from June 2001 to January 2009]:**

Former Members: Mathew W. MacCumber, MD, PhD (Director); Bruce Gaynes, OD, PharmD; Christina Giannoulis; Pamela Hulvey; Harold Kessler, MD; Heena S. Khan; Andrea Kopp; Pauline Merrill, MD; Frank Morini; Nada Smith; Allen Tenorio, MD; Denise Voskuil-Marre; Kisung Woo.

### **University of California, Irvine [Active from April 1998 to January 2009]:**

Former Members: Baruch D. Kuppermann, MD, PhD (Director); Bogdan Alexandiescu, MD; Donald N. Forthal, MD; Jeff Grijalva, COT; Faisal Jehan, MD; Karen Lopez; Rosie Magallon, BA; Nader Moinfar, MD; Bret Trump; Melody Vega, COA; Randy Williams.

### **University of Southern California, Los Angeles, CA [Active from April 1998 to July 2008]:**

Former Members: Jennifer I. Lim, MD (Director); Rizwan Bhatti, MD; John Canzano, MD; Thomas S. Chang, MD; Alexander Charonis, MD; Lawrence Chong, MD; Robert Equi, MD; Amani Fawzi, MD; Christina Flaxel, MD; Jesus Garcia; Todd Klesert, MD; Francoise Kramer, MD; Lori Levin, MPH; Tracy Nichols, COA, CRA; Christopher Pelzek, MD; Margaret Podilla, BS; Len Richine; Danny Romo, COA; Srinivas Sadda, MD; Richard Scartozzi, MD; Robert See, MD; Kevin Shiramizu, MD; Mark Thomas; A. Frances Walonker, CO, MPH; Alexander Walsh, MD; Ziquiang Wu, MD.

### **University of Texas Medical Branch, Galveston, TX [Active from July 1997 to January 2009]:**

Former Members: Garvin Davis, MD (Director); Robert Blem, MD; J. Mike Bourg, BA; Gibran Khurshid, MD; John Horna, BS; Craig Kelso; Vivian Keys; Zbigniew Krason, BS; Helen K. Li, MD; Lan-Chi Nguyen, COMT; Rhonda Nolen, BS, CRC; Michelle Onarato, MD; David Paar, MD; Steven Rivas; Vicky Seitz, COT; Happy Spillar; Sami Uwaydat, MD.

**LSOCA Grant Support:**

Supported by cooperative agreements from the National Eye Institute to Mount Sinai School of Medicine (U10 EY 08052), The Johns Hopkins University Bloomberg School of Public Health (U10 EY 08057), and the University of Wisconsin, Madison School of Medicine (U10 EY 08067). The content is solely the responsibility of the authors and does not necessarily represent the official views of the National Eye Institute or the National Institutes of Health.

Additional support provided by National Center for Research Resources through General Clinical Research Center grants:

- 5M01 RR 00350 (Baylor College of Medicine)
- 5M01 RR00039 (Emory University)
- 5M01 RR 05096 (LSU/Tulane/Charity Hospital)
- 5M01 RR00096 (New York University Medical Center, New York)
- 5M01 RR 00865 (University of California, Los Angeles)
- 5M01 RR00046 (University of North Carolina)
- 5M01 RR00043 (University of Southern California)
- ULI RR024996 (Weill Medical College of Cornell University)

Support also provided through cooperative agreements:

- U01 AI 27674 (Louisiana State University/Tulane)
  - U01 AI 27660 (University of California, Los Angeles)
  - U01 AI 27670 (University of California, San Diego)
  - U01 AI 27663 (University of California, San Francisco)
  - U01 AI25868 (University of North Carolina)
  - U01 AI32783 (University of Pennsylvania)
-
